# Supplementary material for: Why does F-doping enhance the photocatalytic water-splitting performance of mBiVO4? – a density functional theory study
Source: Royal Society of Chemistry journal article supplement (doi:10.1039/c6nj02400a), 2016-12-21
Supplement: c6nj02400a1.pdf [file c6nj02400a1.pdf]

## Electronic Supporting Information

### Why does F-doping enhance the photocatalytic water-splitting performance of *m*BiVO<sub>4</sub>: a density functional study

Lili Wen,<sup>a</sup> Kaining Ding,<sup>\*a</sup> Shuping Huang,<sup>a</sup> Yongfan Zhang,<sup>a,b</sup> Yi Li,<sup>a</sup> and Wenkai Chen<sup>a</sup>

<sup>a</sup> *Department of Chemistry, Research Institute of Photocatalysis, State Key Laboratory of Photocatalysis on Energy and Environment, Fuzhou University, Fuzhou, Fujian, 350108, China*

<sup>b</sup> *Key Laboratory of Optoelectronic Materials Chemistry and Physics, Chinese Academy of Sciences, Fuzhou, Fujian, 350002, China*

\* *To whom correspondence should be addressed. Email: dknfzu@fzu.edu.cn*

## S1. Computational methods

To further evaluate the stabilities after introducing the F atoms, the impurity formation energy ( $E_{form}$ ) is calculated according to the following formula<sup>33</sup>:

$$E_{form} = E_{doped} - E_{pure} - \mu_F + \mu_O \quad (1)$$

Where,  $E_{pure}$  and  $E_{doped}$  are the total energies of pure and F-doped  $m\text{BiVO}_4$  systems, respectively.  $\mu_F$  and  $\mu_O$  are the chemical potentials of F and O atoms, respectively. Here, gaseous fluorine ( $\text{F}_2$ ) and gaseous oxygen ( $\text{O}_2$ ) are used to determine the chemical potentials :  $\mu_F=1/2\mu(\text{F}_2)$ ,  $\mu_O=1/2\mu(\text{O}_2)$ .

Table S1 The formation energies ( $E_{form}$ ) of the F-doped  $m\text{BiVO}_4$  (010) and (110) surfaces

|                      | (010) surface |       |       | (110) surface |       |       |       |
|----------------------|---------------|-------|-------|---------------|-------|-------|-------|
|                      | F@O1          | F@O2  | F@O3  | F@O1          | F@O2  | F@O3  | F@O4  |
| $E_{form}/\text{eV}$ | -0.69         | -0.35 | -0.23 | -0.64         | -0.61 | -0.55 | -0.19 |

To avoid the formation of hydrogen bonds between  $\text{H}_2\text{O}$  molecules and calculate the adsorption energy accurately, the (2×2) supercell for (010) and (110) surfaces were used to adsorb one  $\text{H}_2\text{O}$  molecule. All the possible adsorbed models (including water molecule parallel lying, v-shape and inverted v-shape respectively adsorbed on top sites of the V, Bi and O atoms) were optimized, and the most stable adsorbed models on the pure (010) and (110) surfaces were presented in Fig.10.

the adsorption energy ( $E_{ads}$ ) is calculated by the following definition:

$$E_{ads} = E(\text{H}_2\text{O}/\text{slab}) - [E(\text{H}_2\text{O}) + E(\text{slab})] \quad (2)$$

where  $E(\text{H}_2\text{O}/\text{slab})$ ,  $E(\text{slab})$  and  $E(\text{H}_2\text{O})$  are the total energy of the water adsorbed slab, the total energy of the pure or F-doped slab surfaces without water adsorption and the total energy of a relaxed water molecule, respectively. The calculated values of  $E_{ads}$  are listed in Table S2.

Table S2 The adsorption energies ( $E_{\text{ads}}/\text{eV}$ ) of water on the pure and F doped (010) and (110) surfaces.

|                            | (010) surface |       | (110) surface |       |       |
|----------------------------|---------------|-------|---------------|-------|-------|
|                            | Pure          | F@O1  | Pure          | F@O1  | F@O2  |
| $E_{\text{ads}}/\text{eV}$ | -0.50         | -1.45 | -0.55         | -1.32 | -1.49 |

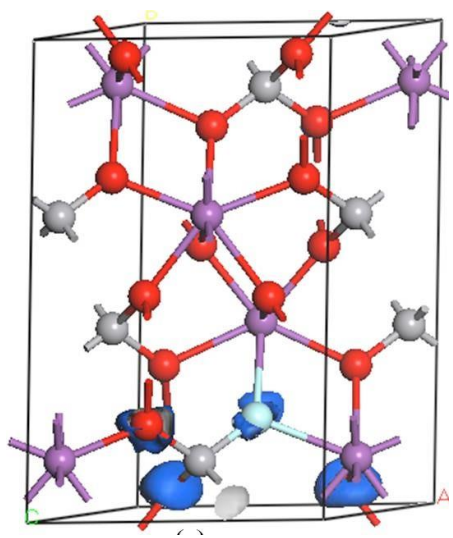

Fig. S1 the spin partial density of states for F-doped  $m\text{BiVO}_4$  bulk.
